# Supplementary material for: Anti-malarial prescription practices among outpatients with laboratory-confirmed malaria in the setting of a health facility-based sentinel site surveillance system in Uganda
Source: PubMed Central journal article supplement (PMC3723425; doi:10.1186/1475-2875-12-252), 2013-07-19
Supplement: 1475-2875-12-252-S1.pdf [file 1475-2875-12-252-S1.pdf]

# Patient Record Form

Clinic \_\_\_\_\_

|                          |                        |                             |                                                                      |                                                                            |
|--------------------------|------------------------|-----------------------------|----------------------------------------------------------------------|----------------------------------------------------------------------------|
| Date<br> _ _ / _ _ / _ _ | OPD Number<br> _ _ _ _ | Patient's Last Name         | First Name                                                           | New attendance<br><input type="checkbox"/> Yes <input type="checkbox"/> No |
| Parish                   | Village                | Age:<br> _ _  Yrs  _ _  Mos | Sex <input type="checkbox"/> Male<br><input type="checkbox"/> Female | Weight<br> _ _   _   _  kg                                                 |

| History & Exam Findings (complete ALL questions)                                    |                                                                 |                                                                           |                                                                       |                                                                                  |
|-------------------------------------------------------------------------------------|-----------------------------------------------------------------|---------------------------------------------------------------------------|-----------------------------------------------------------------------|----------------------------------------------------------------------------------|
| Fever or history of fever? <input type="checkbox"/> Yes <input type="checkbox"/> No | Cough? <input type="checkbox"/> Yes <input type="checkbox"/> No | Cough ≥ 2 weeks? <input type="checkbox"/> Yes <input type="checkbox"/> No | Weight loss? <input type="checkbox"/> Yes <input type="checkbox"/> No | Drenching night sweats? <input type="checkbox"/> Yes <input type="checkbox"/> No |
|                                                                                     |                                                                 |                                                                           |                                                                       |                                                                                  |
|                                                                                     |                                                                 |                                                                           |                                                                       |                                                                                  |
|                                                                                     |                                                                 |                                                                           |                                                                       |                                                                                  |
|                                                                                     |                                                                 |                                                                           |                                                                       |                                                                                  |

|                                                                                                                                                                                                                                                                                               |                                                                                                                               |                                                                                                                                                                                                                                                                                                                                                                                                                                                                  |
|-----------------------------------------------------------------------------------------------------------------------------------------------------------------------------------------------------------------------------------------------------------------------------------------------|-------------------------------------------------------------------------------------------------------------------------------|------------------------------------------------------------------------------------------------------------------------------------------------------------------------------------------------------------------------------------------------------------------------------------------------------------------------------------------------------------------------------------------------------------------------------------------------------------------|
| <input type="checkbox"/> BS for Malaria <input type="checkbox"/> Pos <input type="checkbox"/> Neg<br><br>Parasite density: _____ (if positive)<br><br><input type="checkbox"/> RDT for Malaria <input type="checkbox"/> Pos <input type="checkbox"/> Neg<br><br>Malaria Lab number  _ _ _ _ _ | <input type="checkbox"/> HIV test <input type="checkbox"/> CTRR <input type="checkbox"/> CTR<br><br>HIV Lab number  _ _ _ _ _ | <input type="checkbox"/> TB exam: <u>Date collected:</u> <u>Type</u> <u>Date reported:</u><br>1 <sup>st</sup> smear <input type="checkbox"/> Pos <input type="checkbox"/> Neg ___/___/___ <input type="checkbox"/> LM <input type="checkbox"/> FM ___/___/___<br>2 <sup>nd</sup> smear <input type="checkbox"/> Pos <input type="checkbox"/> Neg ___/___/___ <input type="checkbox"/> LM <input type="checkbox"/> FM ___/___/___<br><br>TB Lab number  _ _ _ _ _ |
| <input type="checkbox"/> Stool ordered - Results:                                                                                                                                                                                                                                             | <input type="checkbox"/> Urinalysis ordered - Results:                                                                        | <input type="checkbox"/> Hb  _ _ _ _ _  g/dl<br><br><input type="checkbox"/> VDRL test <input type="checkbox"/> Pos <input type="checkbox"/> Neg<br><br><input type="checkbox"/> Other (test/result)                                                                                                                                                                                                                                                             |

| Diagnoses (Check all that apply)                    |                                                         |                                                           |                                                               |
|-----------------------------------------------------|---------------------------------------------------------|-----------------------------------------------------------|---------------------------------------------------------------|
| Reportable Diseases                                 | Infectious Diseases                                     | Non-infectious Diseases                                   | Maternal and Perinatal Diseases                               |
| <input type="checkbox"/> Acute flaccid paralysis    | <input type="checkbox"/> AIDS/HIV                       | <input type="checkbox"/> Alcohol and drug abuse           | <input type="checkbox"/> Abortions                            |
| <input type="checkbox"/> Cholera                    | <input type="checkbox"/> Cough or Cold (no pneumonia)   | <input type="checkbox"/> Anaemia                          | <input type="checkbox"/> Haemorrhage during pregnancy         |
| <input type="checkbox"/> Dysentery                  | <input type="checkbox"/> Diarrhea- Acute                | <input type="checkbox"/> Animal and Snake bites           | <input type="checkbox"/> High BP during pregnancy             |
| <input type="checkbox"/> Guinea worm                | <input type="checkbox"/> Diarrhea- Persistent           | <input type="checkbox"/> Asthma                           | <input type="checkbox"/> Obstructed labour                    |
| <input type="checkbox"/> Hemorrhagic fever          | <input type="checkbox"/> Intestinal worms               | <input type="checkbox"/> Cardiovascular- High BP          | <input type="checkbox"/> Perinatal conditions in newborns     |
| <input type="checkbox"/> Measles                    | <input type="checkbox"/> Leprosy                        | <input type="checkbox"/> Cardiovascular- Other            |                                                               |
| <input type="checkbox"/> Meningitis (Meningococcal) | <input type="checkbox"/> Malaria (not during pregnancy) | <input type="checkbox"/> Childhood mental disorder        | Miscellaneous Diseases                                        |
| <input type="checkbox"/> Plague                     | <input type="checkbox"/> Malaria (during pregnancy)     | <input type="checkbox"/> Diabetes Mellitus                | <input type="checkbox"/> Death in OPD (no diagnosis)          |
| <input type="checkbox"/> Rabies                     | <input type="checkbox"/> Meningitis (Non meningococcal) | <input type="checkbox"/> Epilepsy                         | <input type="checkbox"/> ENT Conditions                       |
| <input type="checkbox"/> Tetanus (0-28 days age)    | <input type="checkbox"/> Onchocerciasis                 | <input type="checkbox"/> GI disorders (non infectious)    | <input type="checkbox"/> Eye Conditions                       |
| <input type="checkbox"/> Yellow Fever               | <input type="checkbox"/> Pelvic Inflammatory Disease    | <input type="checkbox"/> Injuries—Road Traffic Accidents  | <input type="checkbox"/> Skin Conditions                      |
|                                                     | <input type="checkbox"/> Pneumonia                      | <input type="checkbox"/> Injuries—Trauma of other Origin  | <input type="checkbox"/> Oral Diseases and conditions         |
|                                                     | <input type="checkbox"/> Schistosomiasis                | <input type="checkbox"/> Malnutrition- low weight for age |                                                               |
|                                                     | <input type="checkbox"/> Sleeping Sickness              | <input type="checkbox"/> Malnutrition- severe             | Other Cough Diagnoses                                         |
|                                                     | <input type="checkbox"/> STI                            | <input type="checkbox"/> Mental Illness- Anxiety          | <input type="checkbox"/> Acute Bronchitis/LRTI (no pneumonia) |
|                                                     | <input type="checkbox"/> Tetanus (over 28 days age)     | <input type="checkbox"/> Mental Illness- Depression       | <input type="checkbox"/> Allergic Rhinitis                    |
|                                                     | <input type="checkbox"/> Typhoid Fever                  | <input type="checkbox"/> Mental Illness- Mania            | <input type="checkbox"/> COPD                                 |
|                                                     | <input type="checkbox"/> Urinary Tract Infections (UTI) | <input type="checkbox"/> Mental Illness- Schizophrenia    | <input type="checkbox"/> Heartburn                            |
|                                                     |                                                         | <input type="checkbox"/> Mental Illness- Other            |                                                               |
| Other Diagnosis                                     |                                                         |                                                           |                                                               |

| Treatment (Check all that apply). For antimalarial drugs, Tick DA if Drug is Available and given or Tick OS if Drug is Out of Stock or Tick ANG if Drug is Available but not Given |                                                                            |                                          |      |
|------------------------------------------------------------------------------------------------------------------------------------------------------------------------------------|----------------------------------------------------------------------------|------------------------------------------|------|
| Drug                                                                                                                                                                               | Dose                                                                       | Drug                                     | Dose |
| <b>Antimalarial</b>                                                                                                                                                                | <b>DA OS ANG</b>                                                           | <b>Other Drugs</b>                       |      |
| <input type="checkbox"/>                                                                                                                                                           | <input type="checkbox"/> <input type="checkbox"/> <input type="checkbox"/> | <input type="checkbox"/> Aspirin         |      |
| <input type="checkbox"/> Quinine                                                                                                                                                   | <input type="checkbox"/> <input type="checkbox"/> <input type="checkbox"/> | <input type="checkbox"/> Cough linctus   |      |
| <input type="checkbox"/> Chloroquine                                                                                                                                               | <input type="checkbox"/> <input type="checkbox"/> <input type="checkbox"/> | <input type="checkbox"/> Diazepam        |      |
| <input type="checkbox"/> Amodiaquine                                                                                                                                               | <input type="checkbox"/> <input type="checkbox"/> <input type="checkbox"/> | <input type="checkbox"/> Dexamethasone   |      |
| <input type="checkbox"/> SP                                                                                                                                                        | <input type="checkbox"/> <input type="checkbox"/> <input type="checkbox"/> | <input type="checkbox"/> Diclofenac      |      |
| <input type="checkbox"/> Artesunate                                                                                                                                                | <input type="checkbox"/> <input type="checkbox"/> <input type="checkbox"/> | <input type="checkbox"/> Folic Acid      |      |
| <input type="checkbox"/> DP                                                                                                                                                        | <input type="checkbox"/> <input type="checkbox"/> <input type="checkbox"/> | <input type="checkbox"/> Gentian violet  |      |
| <input type="checkbox"/>                                                                                                                                                           | <input type="checkbox"/> <input type="checkbox"/> <input type="checkbox"/> | <input type="checkbox"/> Hydrocortisone  |      |
| <b>Antimicrobials</b>                                                                                                                                                              |                                                                            | <input type="checkbox"/> Ibuprofen       |      |
| <input type="checkbox"/> Albendazole                                                                                                                                               |                                                                            | <input type="checkbox"/> Magnesium       |      |
| <input type="checkbox"/> Amoxicillin                                                                                                                                               |                                                                            | <input type="checkbox"/> Multivitamin    |      |
| <input type="checkbox"/> Chloramphenicol                                                                                                                                           |                                                                            | <input type="checkbox"/> Nystatin        |      |
| <input type="checkbox"/> Ciprofloxacin                                                                                                                                             |                                                                            | <input type="checkbox"/> Paracetamol     |      |
| <input type="checkbox"/> Cloxacillin                                                                                                                                               |                                                                            | <input type="checkbox"/> Phenytoin       |      |
| <input type="checkbox"/> Cotrimoxazole                                                                                                                                             |                                                                            | <input type="checkbox"/> chloramphenicol |      |
| <input type="checkbox"/> Doxycycline                                                                                                                                               |                                                                            | <input type="checkbox"/> Salbutamol      |      |
| <input type="checkbox"/> Erythromycin                                                                                                                                              |                                                                            | <input type="checkbox"/> Vit. B group    |      |
| <input type="checkbox"/> Gentamicin                                                                                                                                                |                                                                            | <input type="checkbox"/>                 |      |
| <input type="checkbox"/> Mebendazole                                                                                                                                               |                                                                            | Other                                    |      |
| <input type="checkbox"/> Metronidazole                                                                                                                                             |                                                                            | Other                                    |      |
| <input type="checkbox"/> PPF                                                                                                                                                       |                                                                            | Other                                    |      |
| <input type="checkbox"/> Tetracycline                                                                                                                                              |                                                                            | Other                                    |      |
| <input type="checkbox"/> X-pen                                                                                                                                                     |                                                                            | Other                                    |      |

| Referrals and additional notes                       |       | TB Drug Regimen (Check if prescribed) |                                                                            |                              |                                                                            |
|------------------------------------------------------|-------|---------------------------------------|----------------------------------------------------------------------------|------------------------------|----------------------------------------------------------------------------|
| <input type="checkbox"/> Admitted to ward            | Notes | <b>Initiation:</b>                    | <b>DA OS ANG</b>                                                           | <b>Continuation:</b>         | <b>DA OS ANG</b>                                                           |
| <input type="checkbox"/> Referred to HIV care        |       | <input type="checkbox"/> RHZE         | <input type="checkbox"/> <input type="checkbox"/> <input type="checkbox"/> | <input type="checkbox"/> HE  | <input type="checkbox"/> <input type="checkbox"/> <input type="checkbox"/> |
| <input type="checkbox"/> Referred for TB care        |       | <input type="checkbox"/> RHZES        | <input type="checkbox"/> <input type="checkbox"/> <input type="checkbox"/> | <input type="checkbox"/> RHE | <input type="checkbox"/> <input type="checkbox"/> <input type="checkbox"/> |
| <input type="checkbox"/> Referred for other services |       | <input type="checkbox"/> RHZ          | <input type="checkbox"/> <input type="checkbox"/> <input type="checkbox"/> | <input type="checkbox"/> RH  | <input type="checkbox"/> <input type="checkbox"/> <input type="checkbox"/> |

Full Name

Signature
